# Supplementary material for: An Electrochromic Ag-Decorated WO3−x Film with Adjustable Defect States for Electrochemical Surface-Enhanced Raman Spectroscopy
Source: MDPI journal article supplement (doi:10.3390/nano12101637), 2022-05-11
Supplement: s1 [file s1]

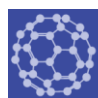

## Supporting Information

# An Electrochromic Ag-Decorated $\text{WO}_{3-x}$ Film with Adjustable Defect States for Electrochemical Surface-Enhanced Raman Spectroscopy

Siqi Qu <sup>1</sup>, Jing Guan <sup>1</sup>, Dongqi Cai <sup>1</sup>, Qianshuo Wang <sup>1</sup>, Xiuyun Wang <sup>1,\*</sup>, Wei Song <sup>2,\*</sup> and Wei Ji <sup>1,3,\*</sup>

<sup>1</sup> School of Chemical Engineering, Dalian University of Technology, Dalian 116024, China; siqibinggan@mail.dlut.edu.cn (S.Q.); 21907028@mail.dlut.edu.cn (J.G.); 13942906490@mail.dlut.edu.cn (D.C.); 20201181003@mail.dlut.edu.cn (Q.W.)

<sup>2</sup> State Key Laboratory of Supramolecular Structure and Materials, Jilin University, Changchun 130012, China

<sup>3</sup> College of Chemistry, Chemical Engineering and Resource Utilization, Northeast Forestry University, Harbin 145040, China

\* Correspondence: xiuyun@dlut.edu.cn (X.W.); weisong@jlu.edu.cn (W.S.); jiwei@dlut.edu.cn (W.J.)

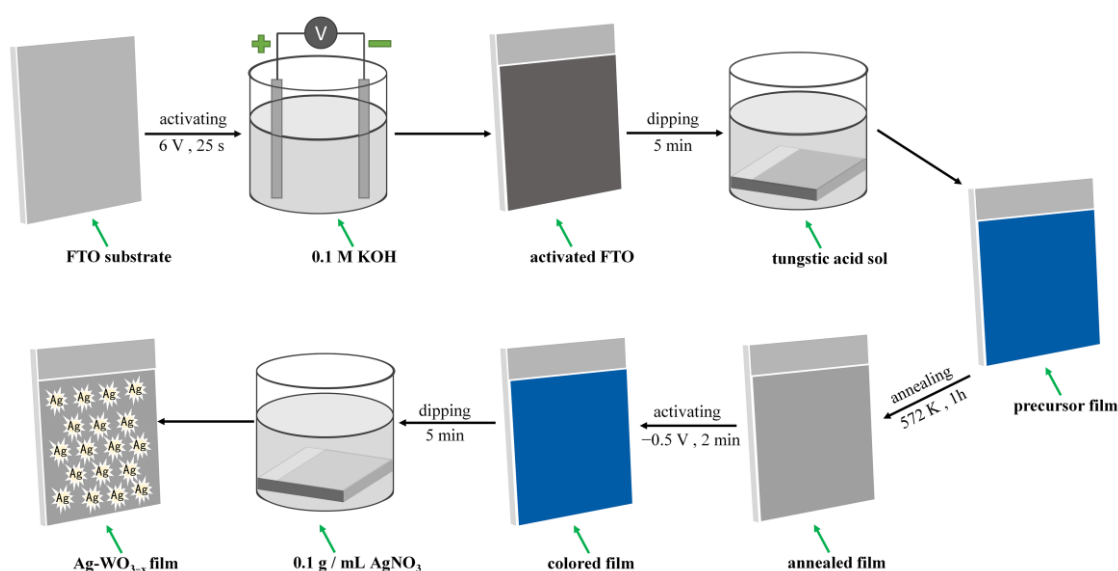

**Figure S1.** Schematic representation of the synthesis of Ag- $\text{WO}_{3-x}$  film through a two-step electrochemical activation.

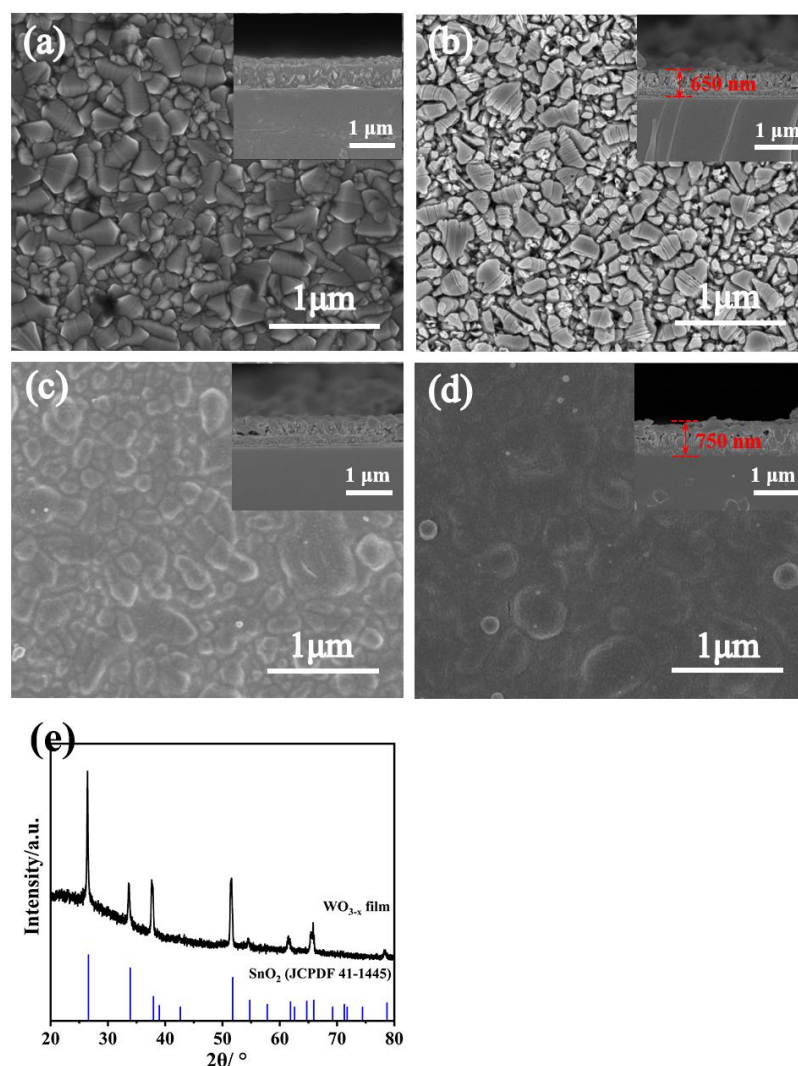

**Figure S2.** SEM images of (a) FTO, (b) activated FTO, and WO<sub>3-x</sub> film (c) before and (d) after annealing in air at 300 °C for 1 h. (e) X-ray diffraction (XRD) pattern of the synthesized WO<sub>3-x</sub> film. It can be seen that the FTO substrate has many diamond-shaped protrusions with a rough surface, and the protrusions become smooth after electrochemical activation (a,b). A blue amorphous tungsten trioxide hydrate film was formed on the activated FTO substrate due to the reaction of Sn layer with the polytungstic acid (c). After annealing, there is no other obvious change except some tiny cracks on the film surface (d). The thickness of the WO<sub>3-x</sub> film is estimated to be about 100 nm.

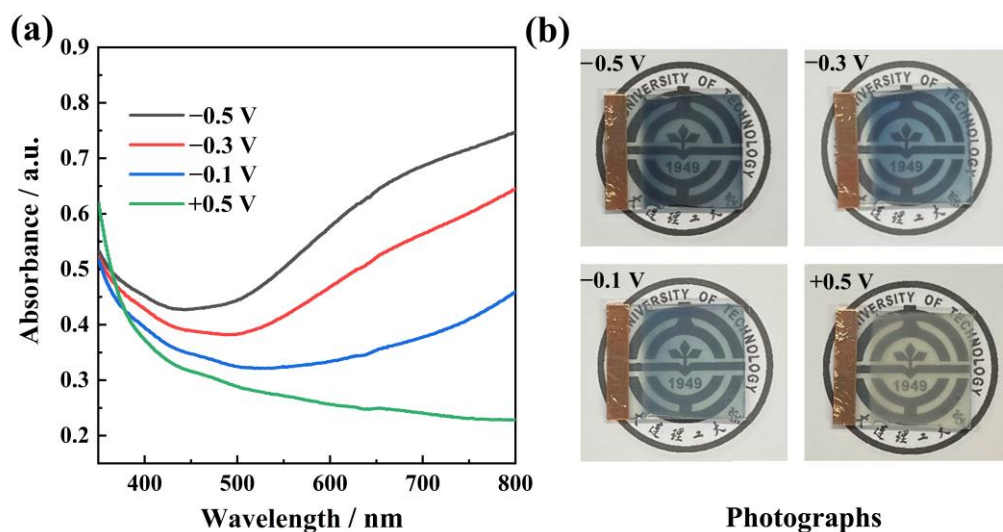

**Figure S3.** (a) UV-Vis-NIR absorption spectra and (b) the corresponding photographs of the  $\text{WO}_{3-x}$  film under the applied potentials of -0.5V, -0.3V, -0.1V and 0.5 V. It can be seen that the degree of discoloration of  $\text{WO}_{3-x}$  film is deepened by the increase of negative potential, and the  $\text{WO}_{3-x}$  film returns to a colorless state when a positive potential is applied to the  $\text{WO}_{3-x}$  film. These results demonstrated the  $\text{WO}_{3-x}$  film has good electrochemical stability, and the content of reduced tungsten can be flexibly tuned by the applied potential.

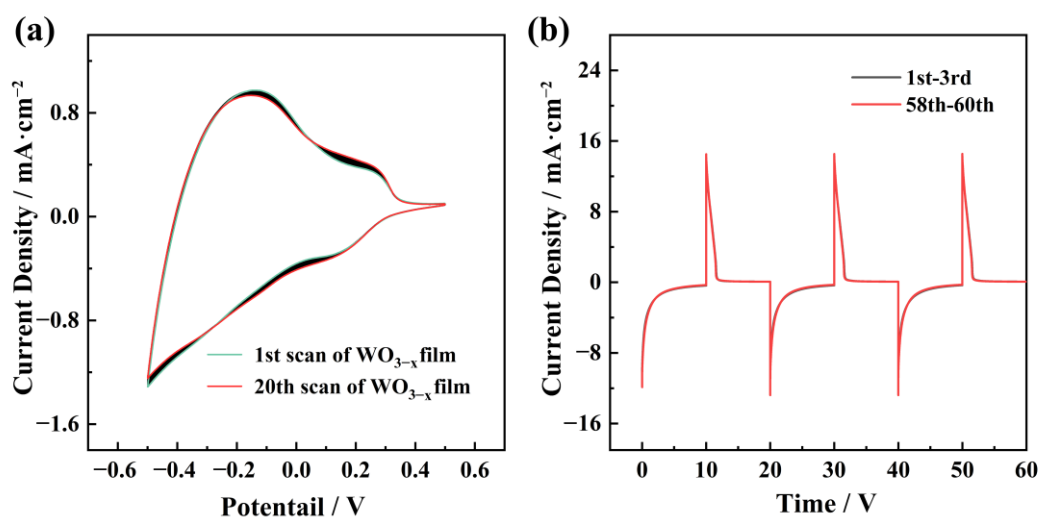

**Figure S4.** (a) CV curves of  $\text{WO}_{3-x}$  film in 0.1 M  $\text{H}_2\text{SO}_4$  with a scan rate of  $50 \text{ mV}\cdot\text{s}^{-1}$  for the 20 cycles. (b) Chronoamperometry curves of  $\text{WO}_{3-x}$  film by alternately applying a potential of  $\pm 0.5 \text{ V}$ , 10 s for each state. The current density of the  $\text{WO}_{3-x}$  film only slightly decreases after 20 CV cycles, indicating that the  $\text{WO}_{3-x}$  film has good cyclic stabilities. (b) compares the chronoamperometry curves of the  $\text{WO}_{3-x}$  film for the first three cycles and the last three cycles. There is no obvious change in the current response peak shape, which further confirmed that the  $\text{WO}_{3-x}$  film shows a good electrochemical stability.

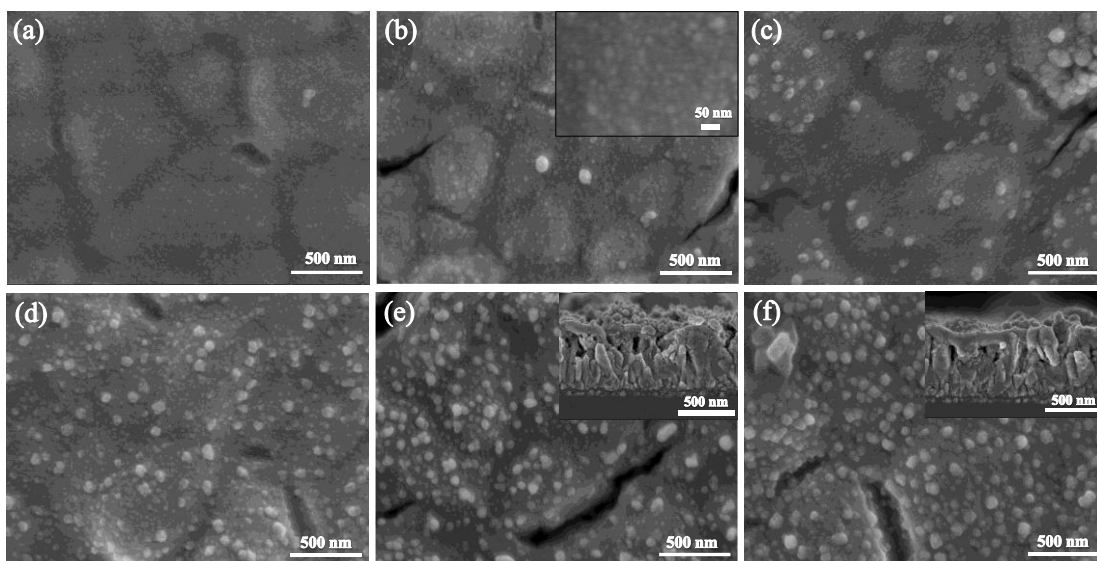

**Figure S5.** SEM images of the Ag-decorated  $\text{WO}_{3-x}$  film synthesized by applying of different activated potentials of (a)  $-0.1$ , (b)  $-0.2$ , (c)  $-0.3$ , (d)  $-0.4$ , (e)  $-0.5$ , and (f)  $-0.6$  V.

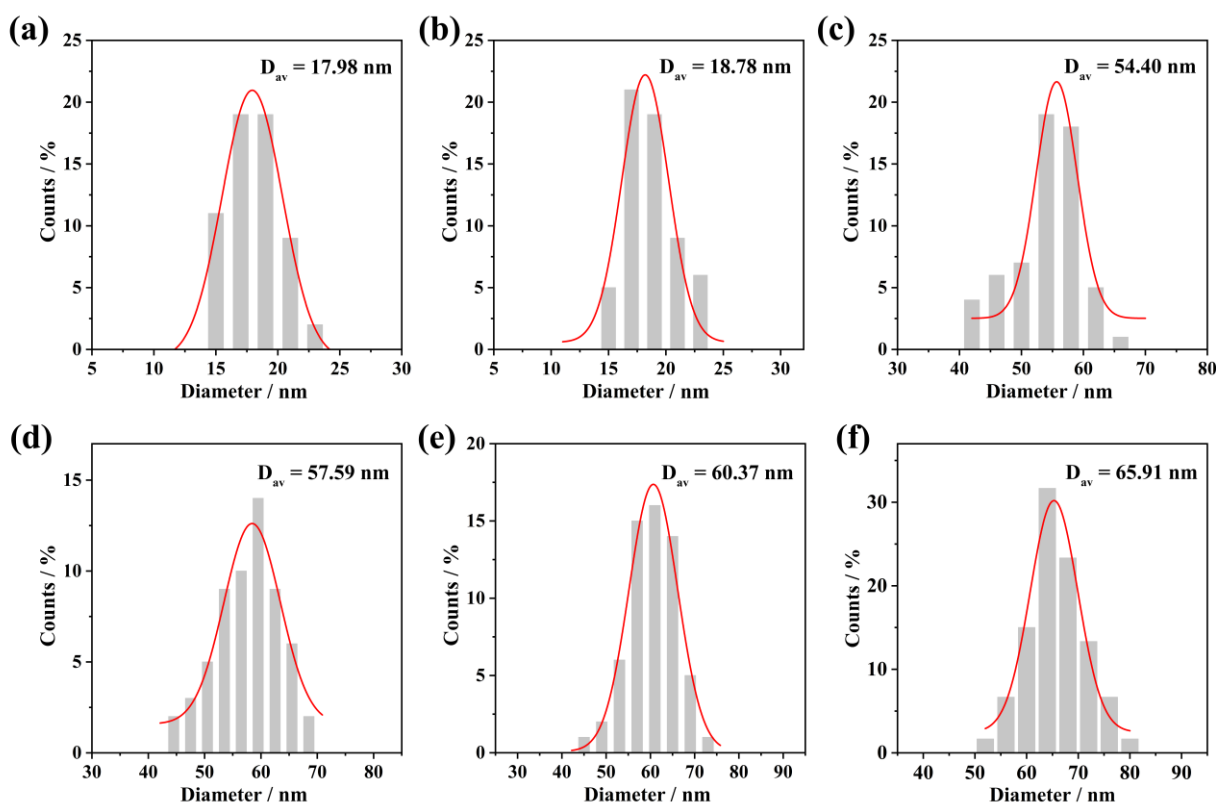

**Figure S6.** Size distributions of the Ag NPs on the synthesized Ag- $\text{WO}_{3-x}$  film under the activation potential of (a)  $-0.1$ , (b)  $-0.2$ , (c)  $-0.3$ , (d)  $-0.4$ , (e)  $-0.5$ , and (f)  $-0.6$  V.

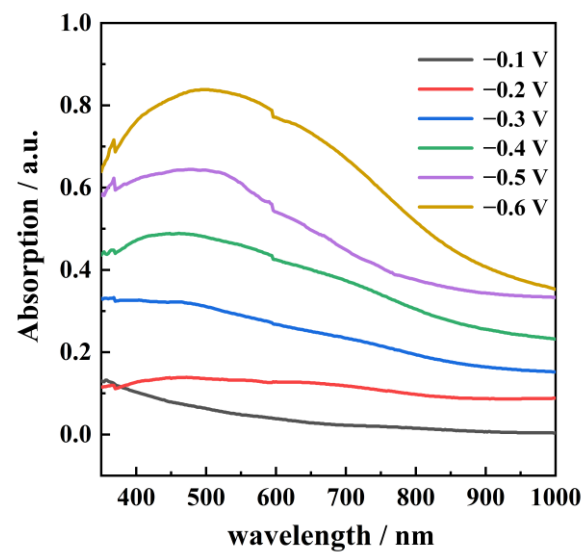

**Figure S7.** UV-Vis-NIR absorption difference spectra of Ag-decorated  $\text{WO}_{3-x}$  film synthesized under different applied potentials.

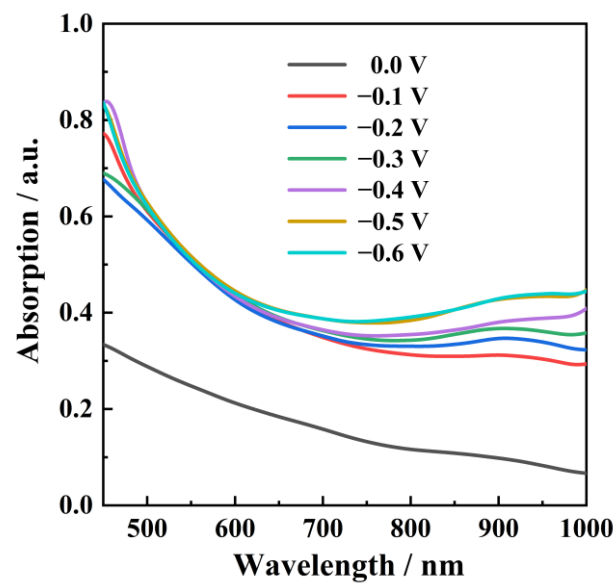

**Figure S8.** The UV-Vis-NIR absorption spectra of Ag-decorated  $\text{WO}_{3-x}$  film under different applied potentials.

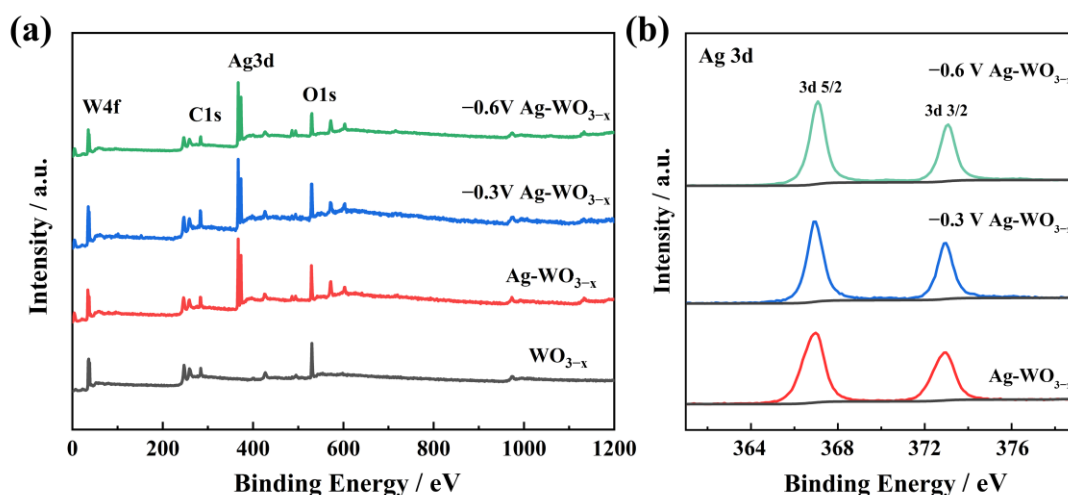

**Figure S9.** (a) Full XPS spectra and (b) high-resolution XPS spectra of Ag3d for various of  $\text{WO}_{3-x}$  and  $\text{Ag-WO}_{3-x}$  samples.

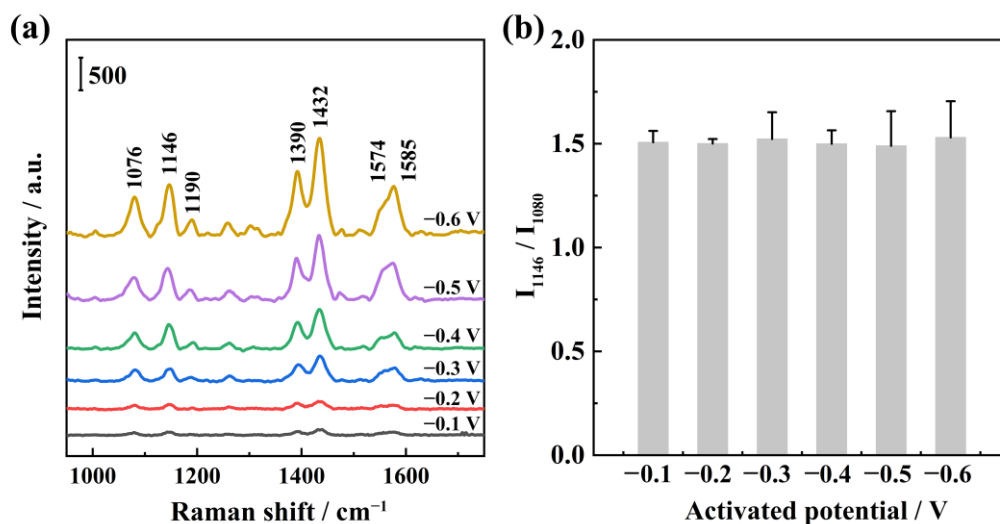

**Figure S10.** (a) SERS spectra of PATP adsorbed on Ag-decorated  $\text{WO}_{3-x}$  film synthesized under different activated potential. (b) Relative intensity of  $I_{1146}/I_{1080}$  as a function of the activated potential.

**Table S1.** The relationship between the activation potential and the diameter of synthesized  $\text{Ag-WO}_{3-x}$  film.

| Activation Potential / V | -0.1  | -0.2  | -0.3  | -0.4  | -0.5  | -0.6  |
|--------------------------|-------|-------|-------|-------|-------|-------|
| Diameter of Ag NPs / nm  | 17.98 | 18.78 | 54.40 | 57.59 | 60.37 | 65.91 |

**Table S2.** Fitting parameters (peak position, peak area and species percentage) for both W4f 7/2 and W4f 5/2 spectra of XPS taken from WO<sub>3-x</sub> and Ag-WO<sub>3-x</sub> activated with different applied potentials.

| Sample                      | Species         | B.E. (eV) |        | Area     |          | W <sup>5+</sup> /W <sup>6+</sup> |
|-----------------------------|-----------------|-----------|--------|----------|----------|----------------------------------|
|                             |                 | 4f 7/2    | 4f 5/2 | 4f 7/2   | 4f 5/2   |                                  |
| WO <sub>3-x</sub>           | W <sup>5+</sup> | 35.77     | 37.94  | 17110.43 | 12832.82 | 0.61                             |
|                             | W <sup>6+</sup> | 35.94     | 38.11  | 27981.36 | 20986.02 |                                  |
| Ag-WO <sub>3-x</sub>        | W <sup>5+</sup> | -         | -      | -        | -        | -                                |
|                             | W <sup>6+</sup> | 34.3      | 36.47  | 34332.16 | 25749.12 |                                  |
| -0.3 V Ag-WO <sub>3-x</sub> | W <sup>5+</sup> | 34.85     | 37.02  | 18363.08 | 13772.31 | 3.18                             |
|                             | W <sup>6+</sup> | 34.96     | 37.12  | 5781.302 | 4335.977 |                                  |
| -0.6 V Ag-WO <sub>3-x</sub> | W <sup>5+</sup> | 34.9      | 37.07  | 64308.90 | 48231.67 | 11.30                            |
|                             | W <sup>6+</sup> | 35.3      | 37.47  | 5692.382 | 4269.287 |                                  |
